# Supplementary material for: From photos to sketches - how humans and deep neural networks process objects across different levels of visual abstraction
Source: PubMed Central journal article supplement (PMC8822363; doi:10.1167/jov.22.2.4), 2022-02-07
Supplement: jovi-22-2-4_s004.pdf [file jovi-22-2-4_s004.pdf]

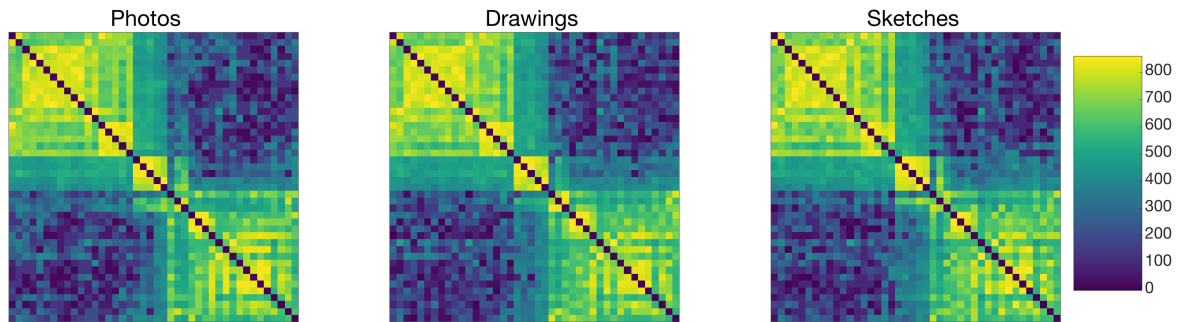

**A4. Human behavioral similarity matrices for the three types of depiction.** Based on the behavioral similarity judgments in the odd one out similarity task we calculated pairwise similarities between objects as the probability of choosing object x and object y as belonging together regardless of the context imposed by object z in the triplet. For visualization purposes all similarities in one matrix were ranked and sorted according to their superordinate category (manmade/natural).
